# Supplementary material for: Photoelectrochemical conversion of glycerol aqueous solution to value-added chemicals using Bi2Fe4O9 as a photoanode
Source: Royal Society of Chemistry journal article supplement (doi:10.1039/d3se01045g), 2023-01-01

Full scale counts: 1762  
Integral Counts: 179345

Base(20)\_pt1

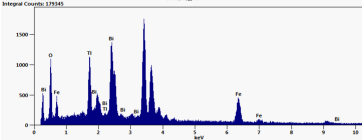

## Spectrum 2:

Full scale counts: 1750  
Integral Counts: 178460

Base(20)\_pt2

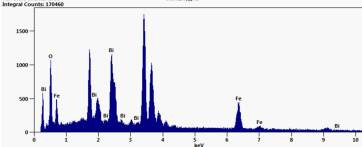

## Spectrum 3:

Full scale counts: 1681  
Integral Counts: 173113

Base(20)\_pt3

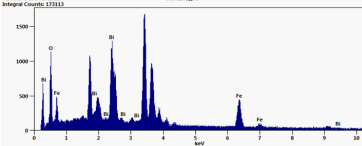

Supplement: d3se01045g1.pdf [file d3se01045g1.pdf]
