# Supplementary figures and images for: Photoelectrochemical conversion of glycerol aqueous solution to value-added chemicals using Bi2Fe4O9 as a photoanode
Source: Royal Society of Chemistry journal article supplement (doi:10.1039/d3se01045g), 2023-01-01

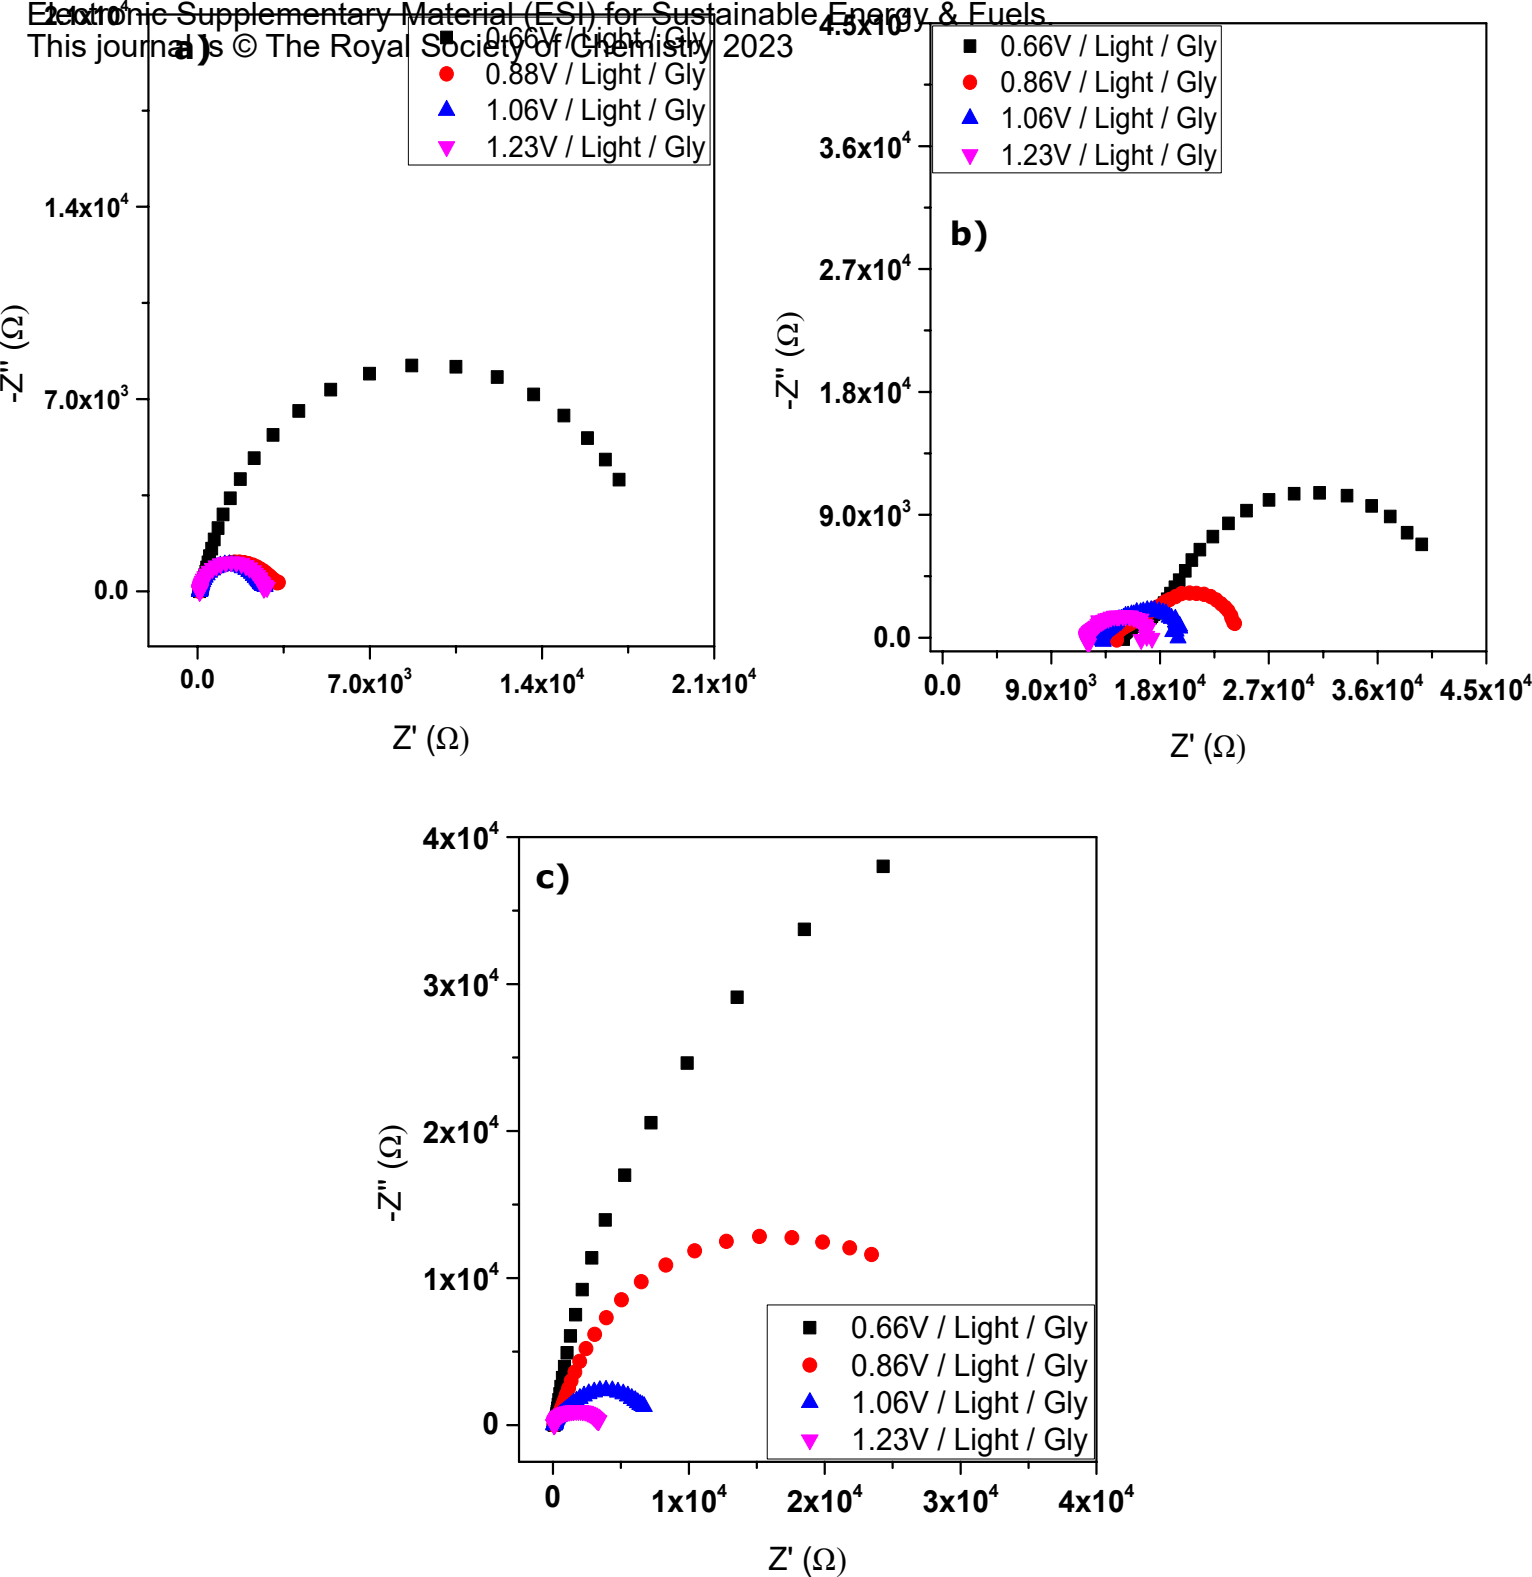

Supplement: d3se01045g10.pdf [file d3se01045g10.pdf]

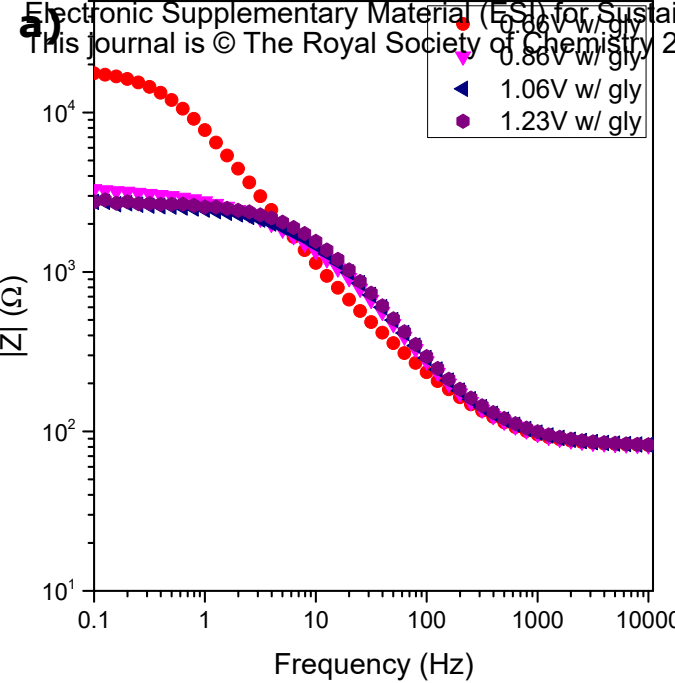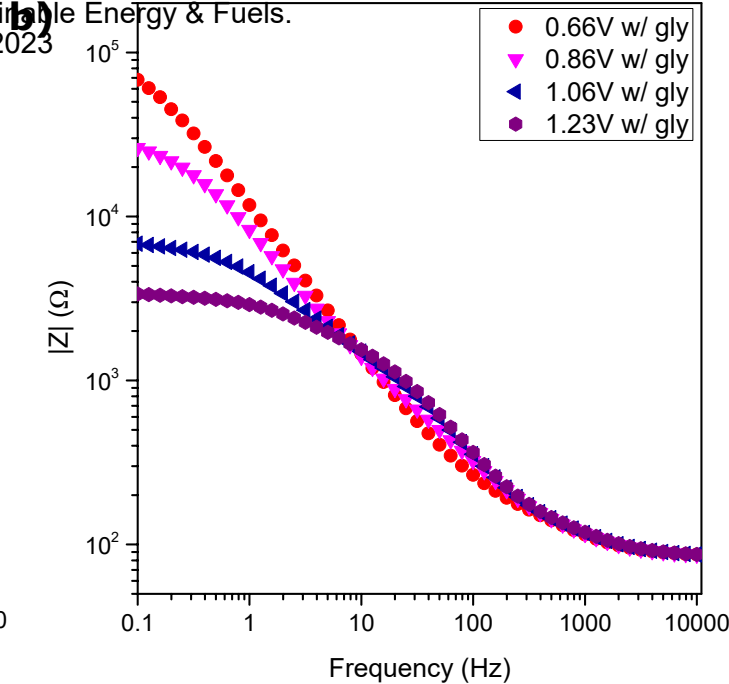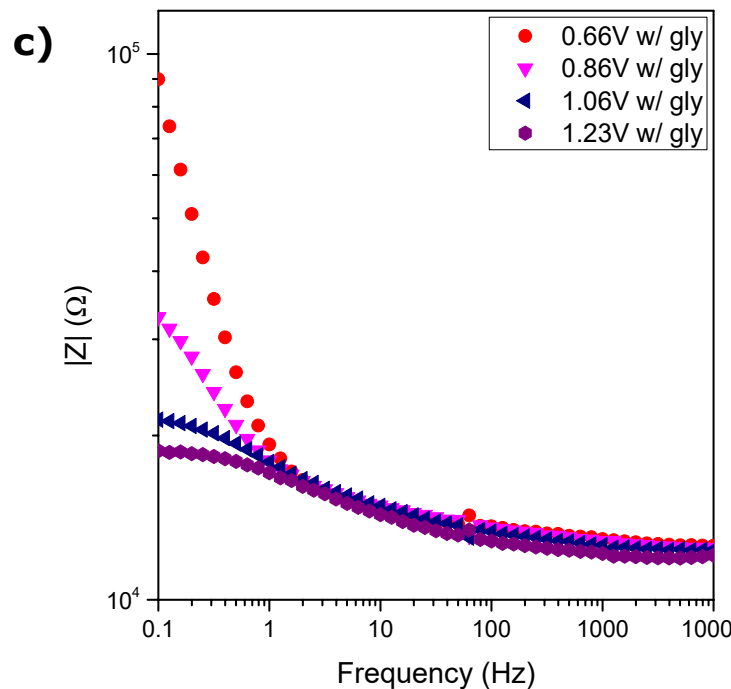

Supplement: d3se01045g11.pdf [file d3se01045g11.pdf]

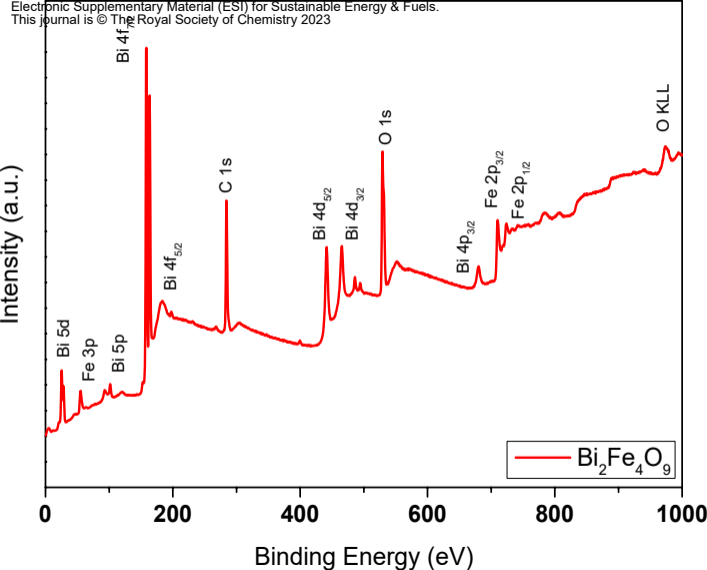

Supplement: d3se01045g12.pdf [file d3se01045g12.pdf]

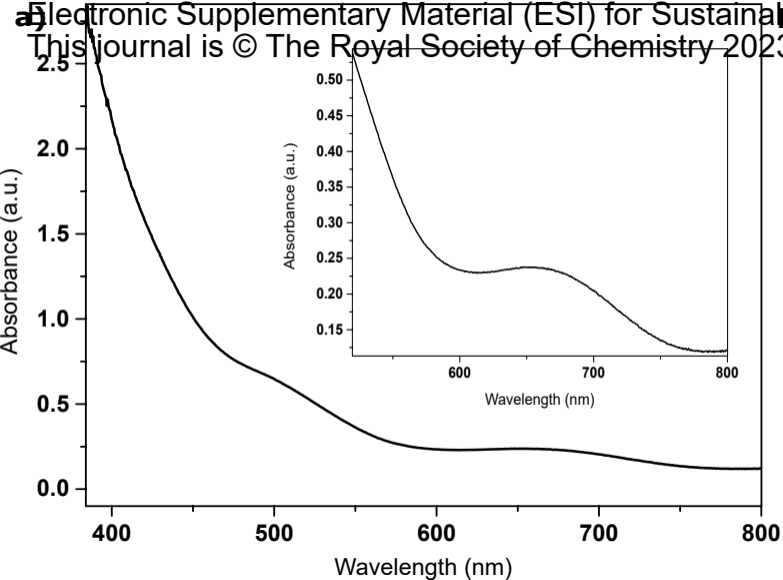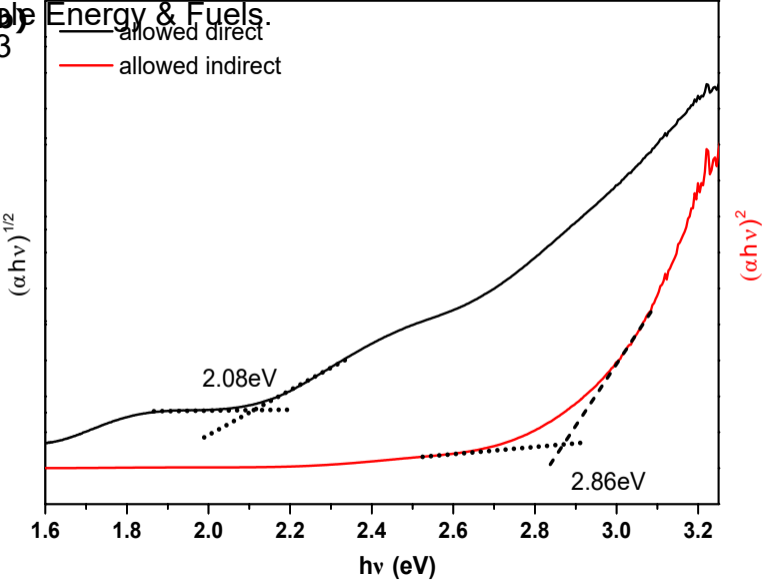

Supplement: d3se01045g13.pdf [file d3se01045g13.pdf]

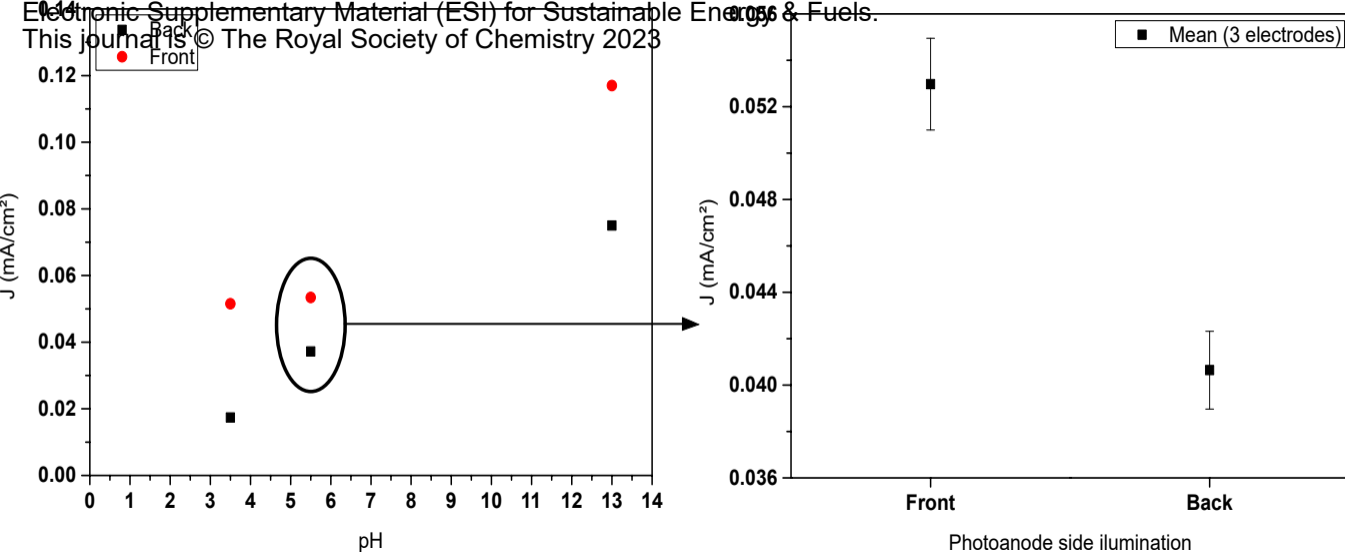

Supplement: d3se01045g14.pdf [file d3se01045g14.pdf]

**a)** This journal is © The Royal Society of Chemistry 20**b3)**

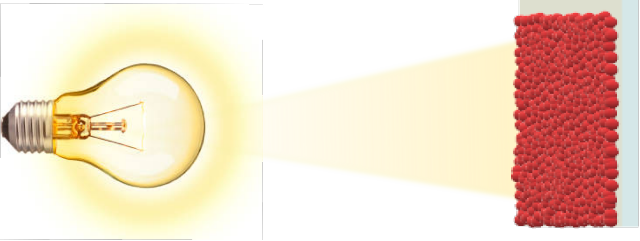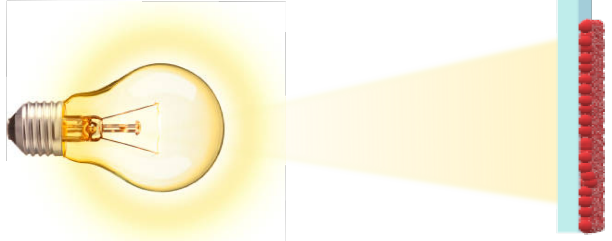

Supplement: d3se01045g15.pdf [file d3se01045g15.pdf]

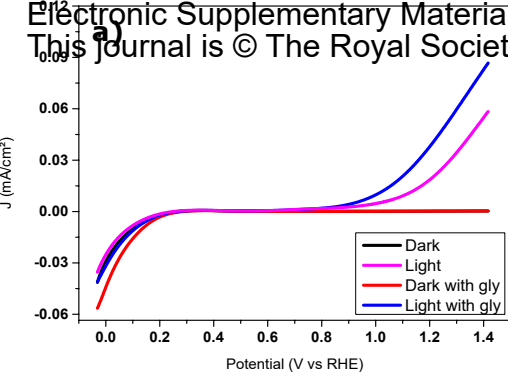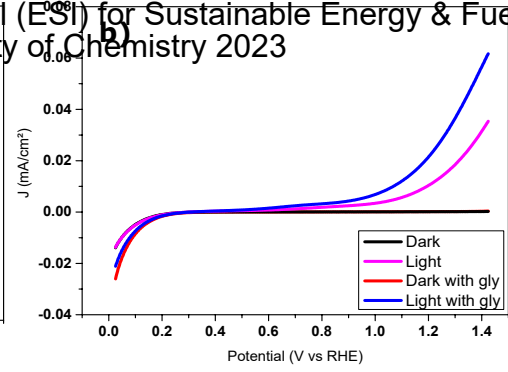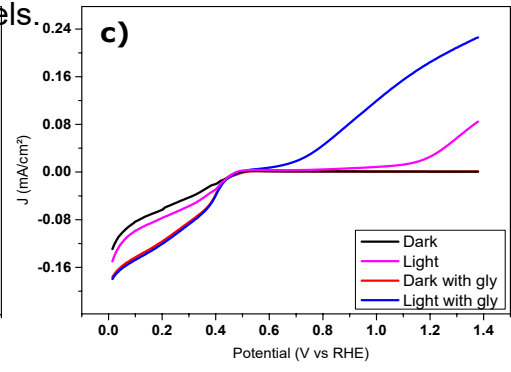

Supplement: d3se01045g16.pdf [file d3se01045g16.pdf]

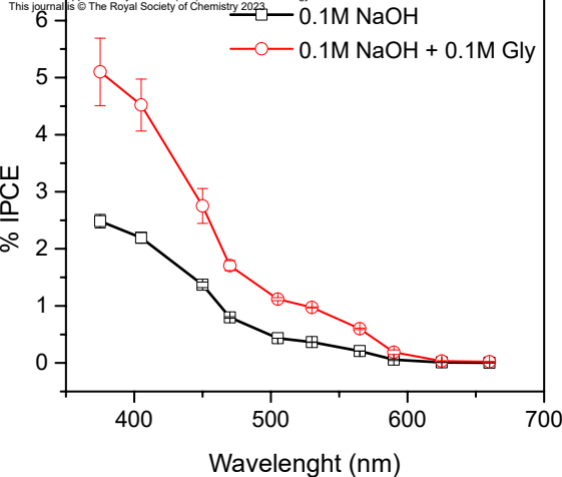

Supplement: d3se01045g17.pdf [file d3se01045g17.pdf]

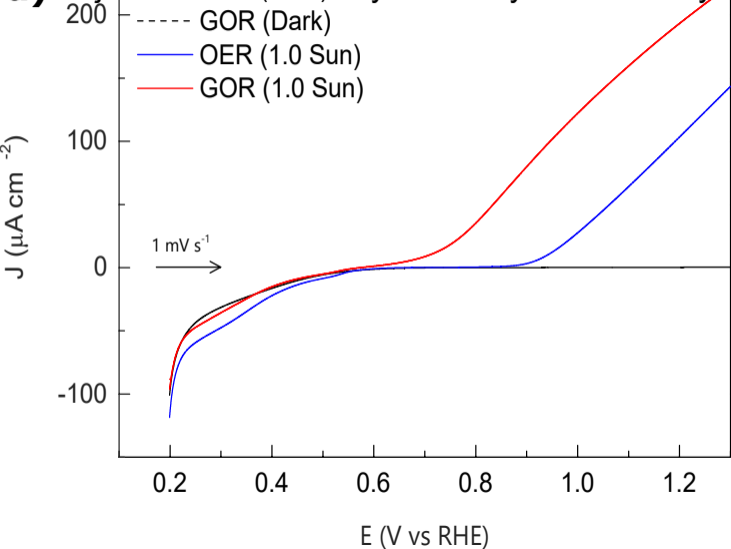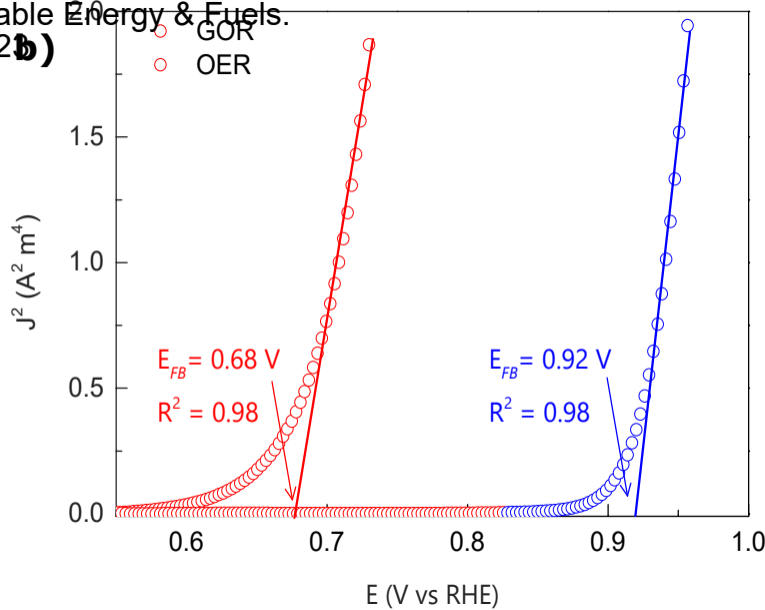

Supplement: d3se01045g18.pdf [file d3se01045g18.pdf]

This journal is © The Royal Society of Chemistry 2023

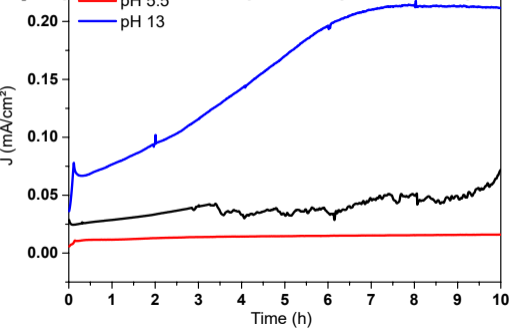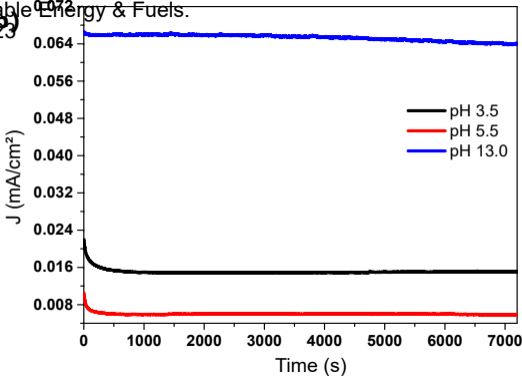

Supplement: d3se01045g19.pdf [file d3se01045g19.pdf]

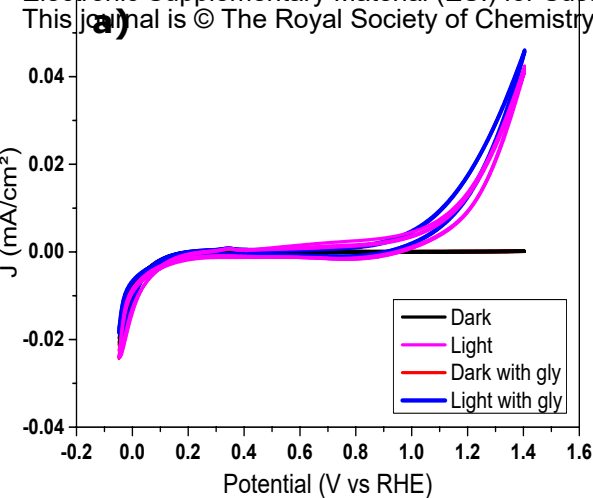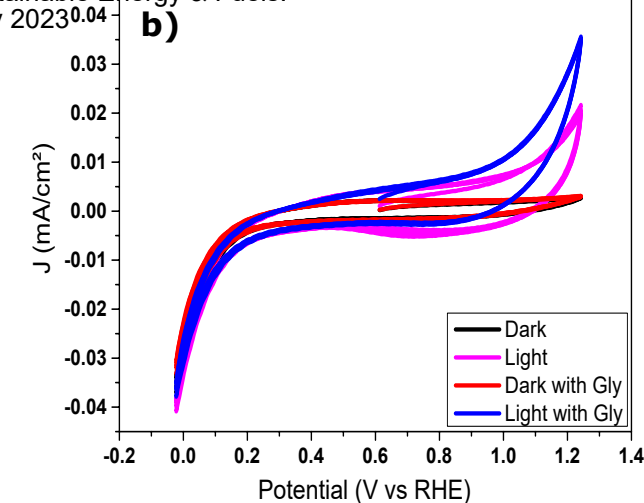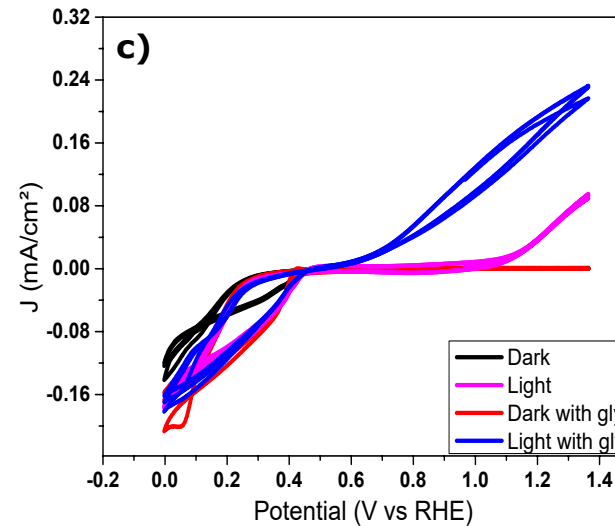

Supplement: d3se01045g2.pdf [file d3se01045g2.pdf]

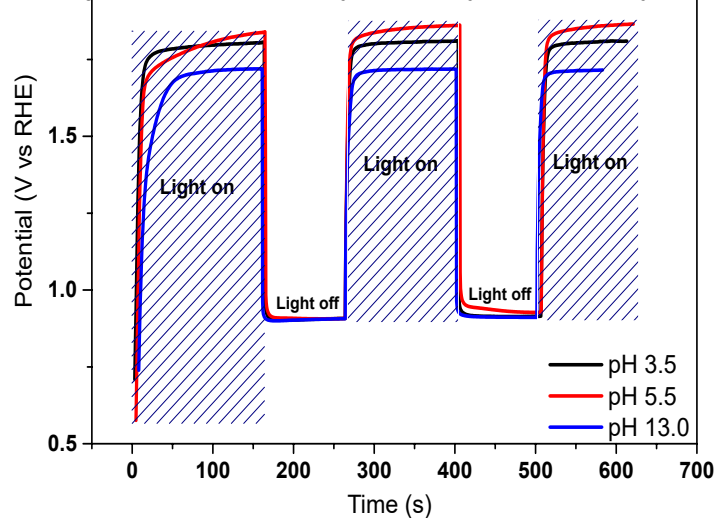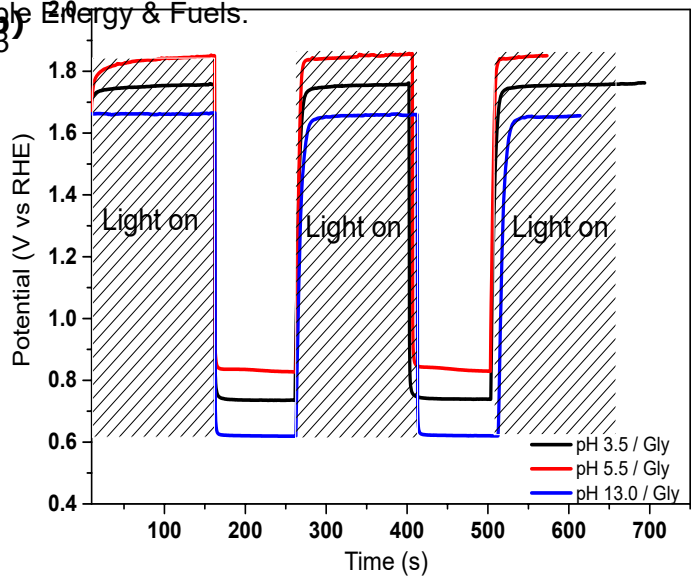

Supplement: d3se01045g3.pdf [file d3se01045g3.pdf]

FTO

$\text{Bi}_2\text{Fe}_4\text{O}_9$

Double  
layer

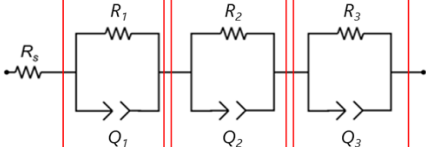

Supplement: d3se01045g4.pdf [file d3se01045g4.pdf]

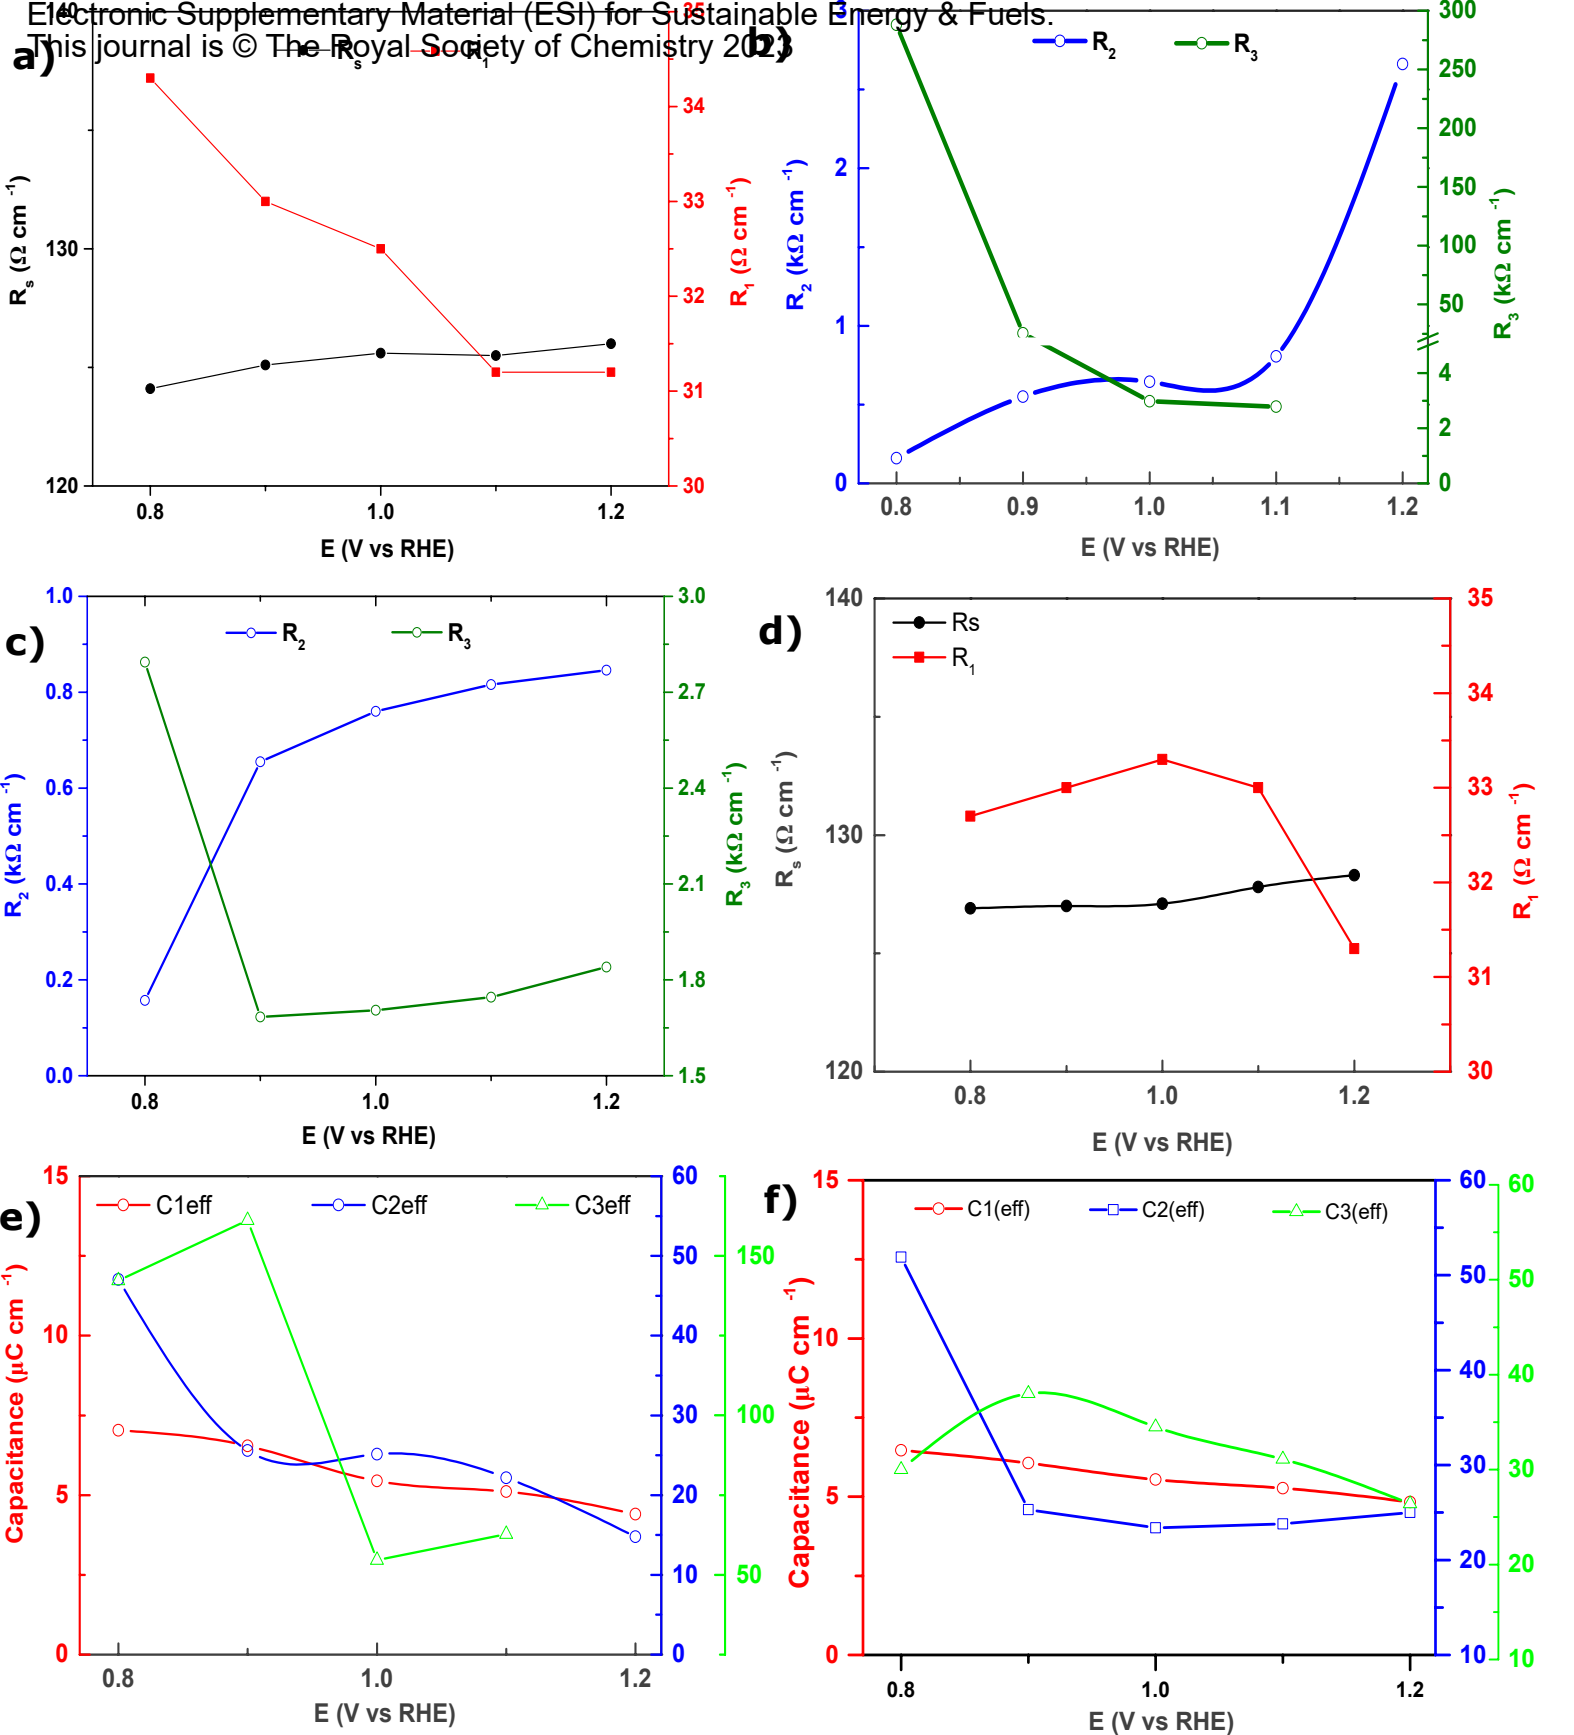

Supplement: d3se01045g5.pdf [file d3se01045g5.pdf]

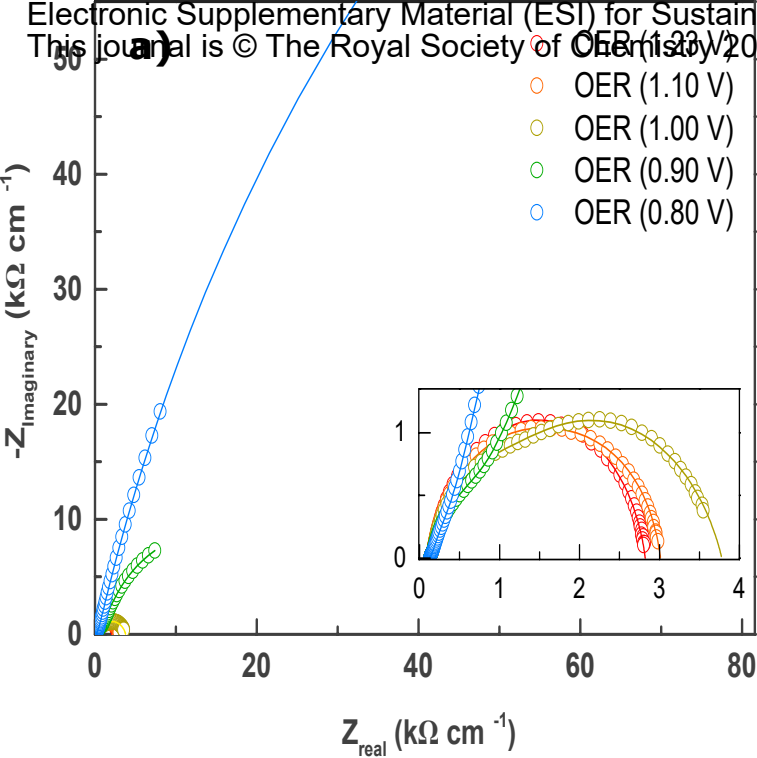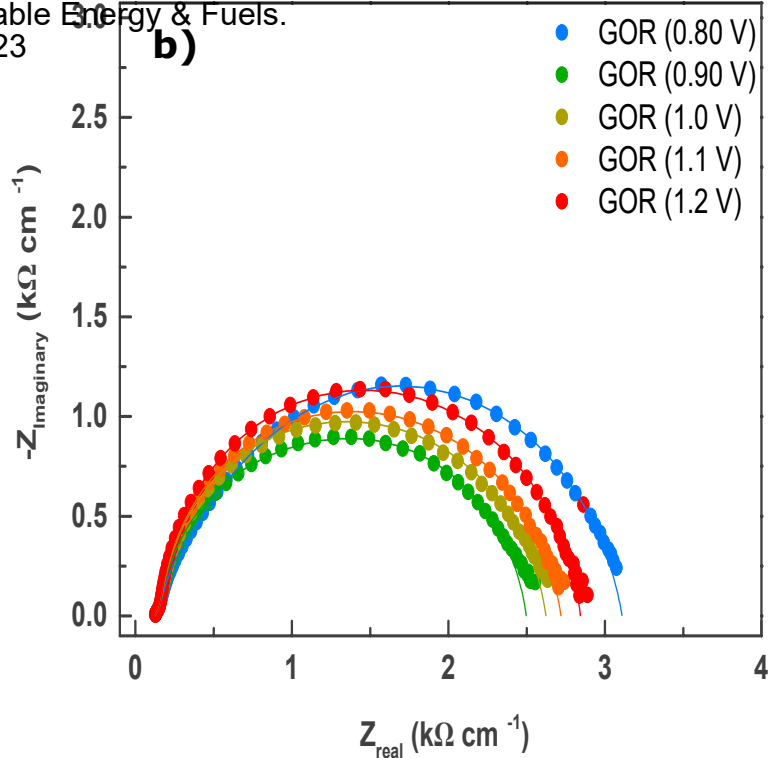

Supplement: d3se01045g6.pdf [file d3se01045g6.pdf]

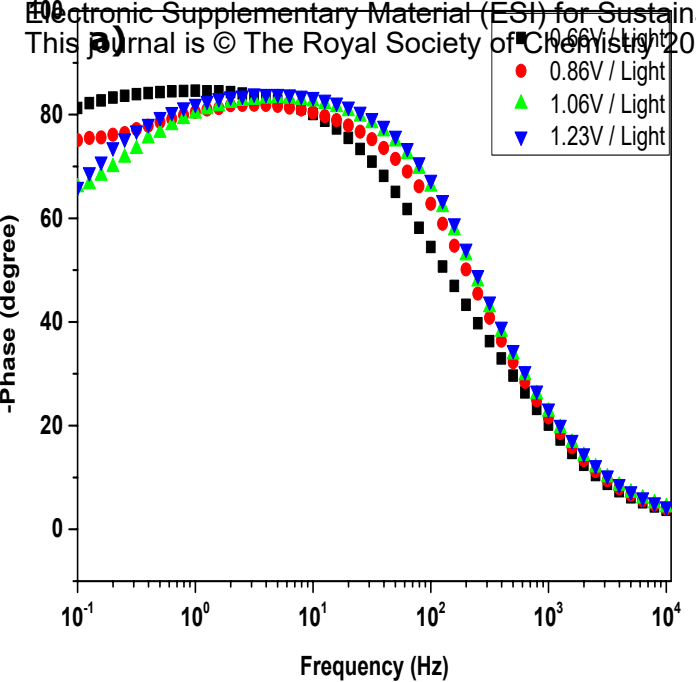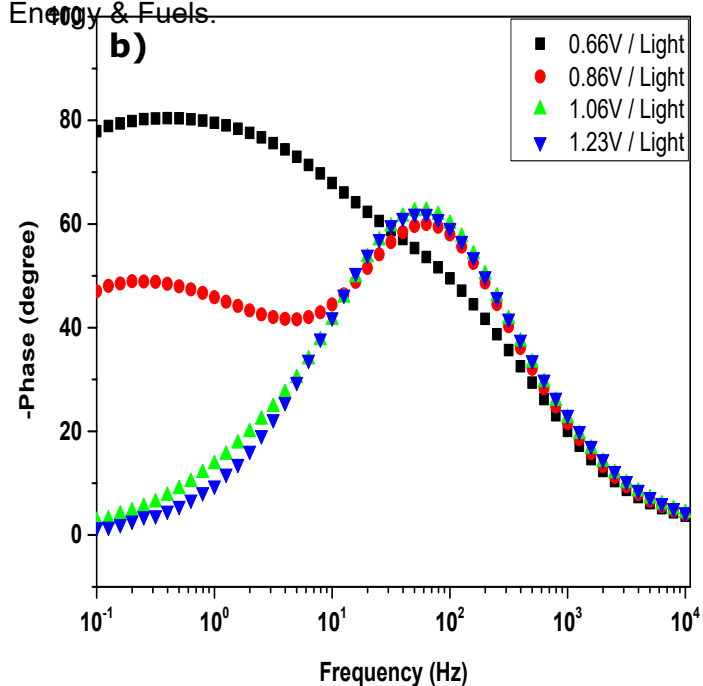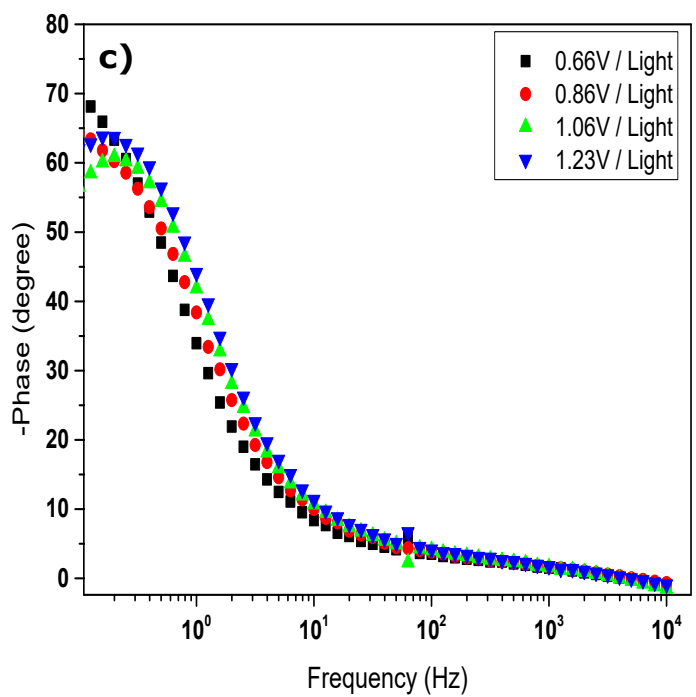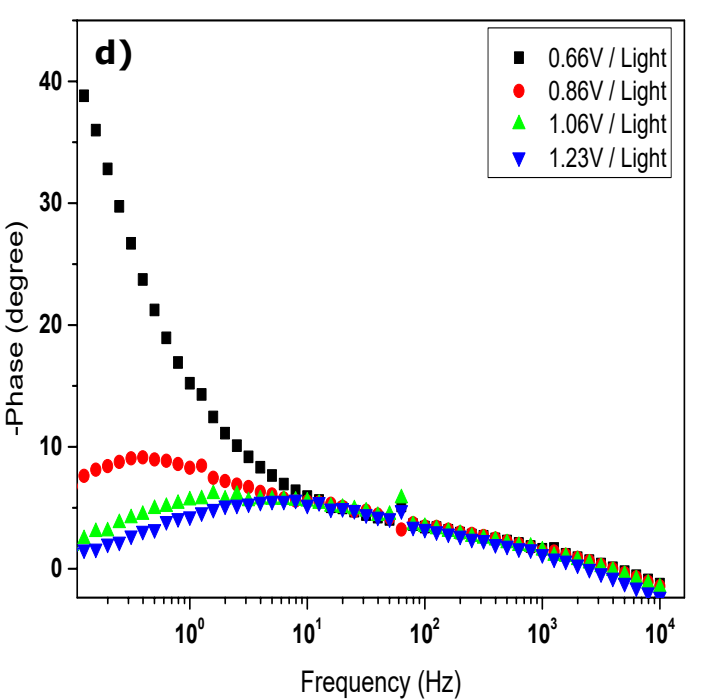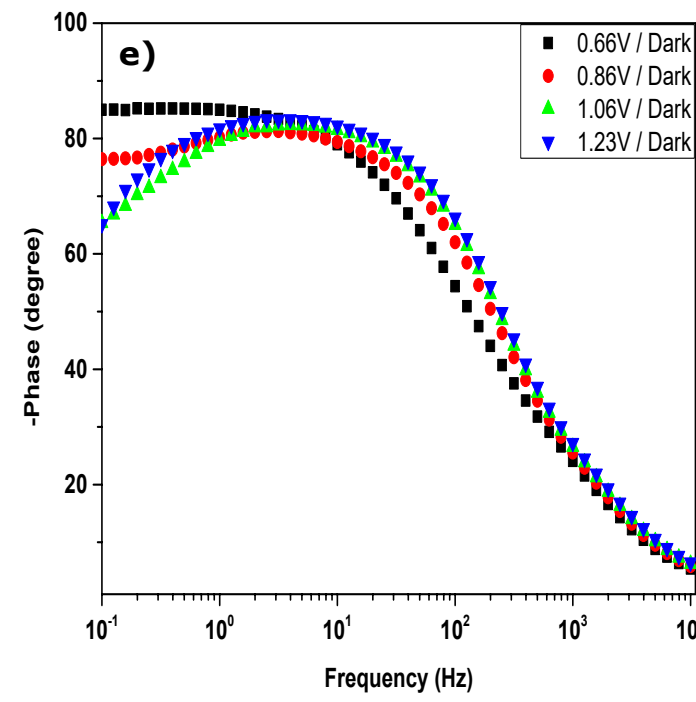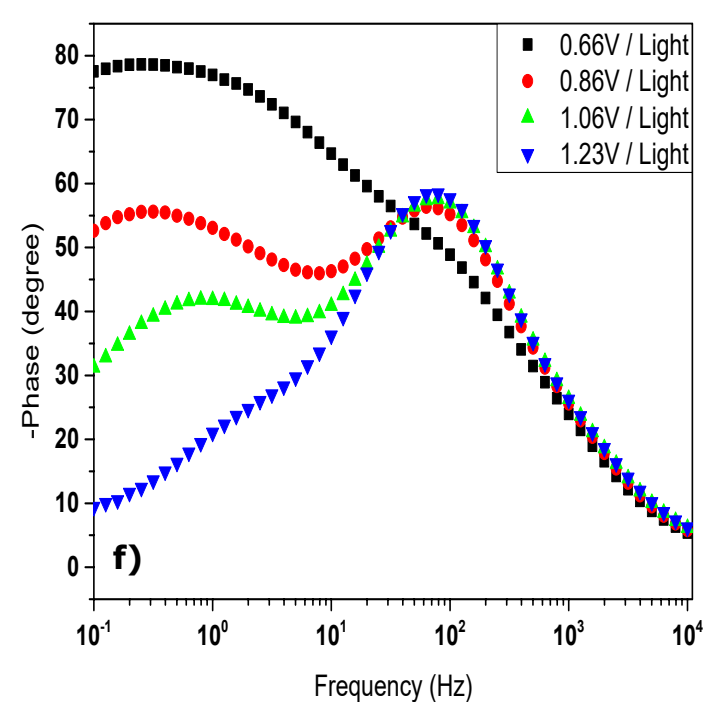

Supplement: d3se01045g7.pdf [file d3se01045g7.pdf]

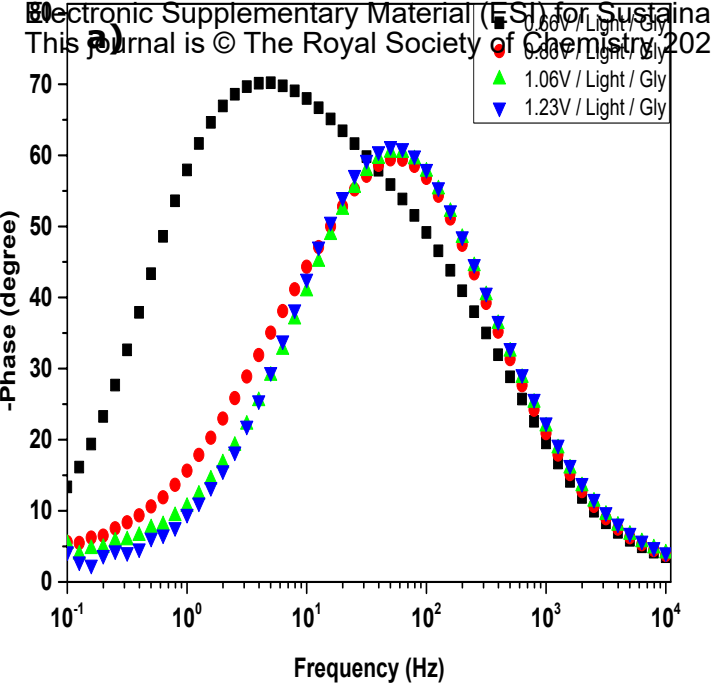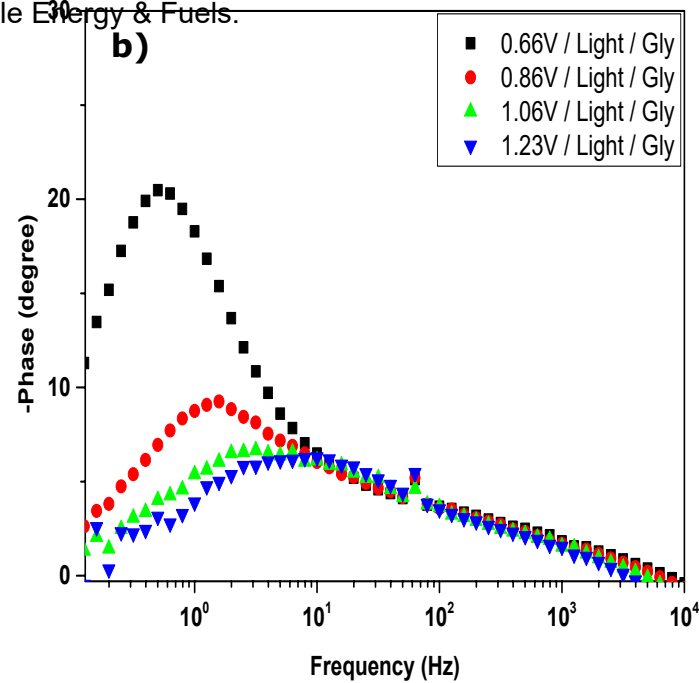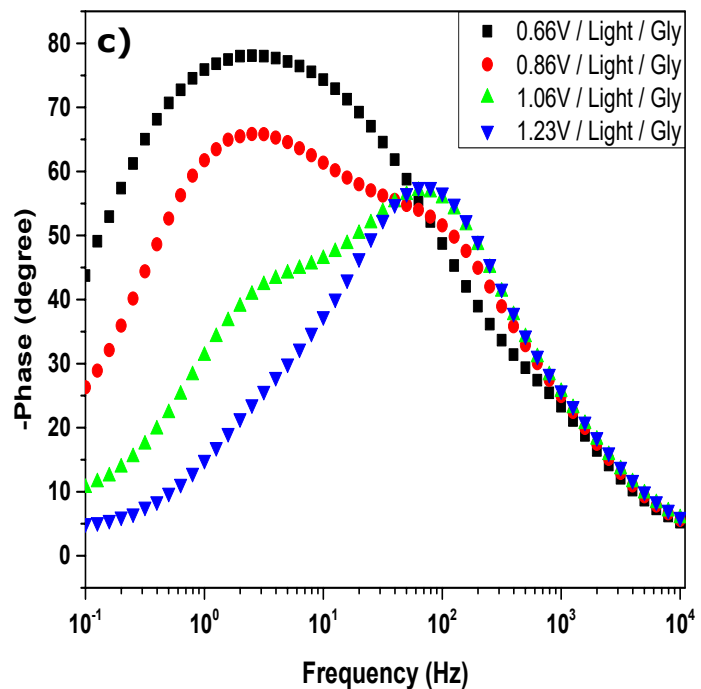

Supplement: d3se01045g8.pdf [file d3se01045g8.pdf]

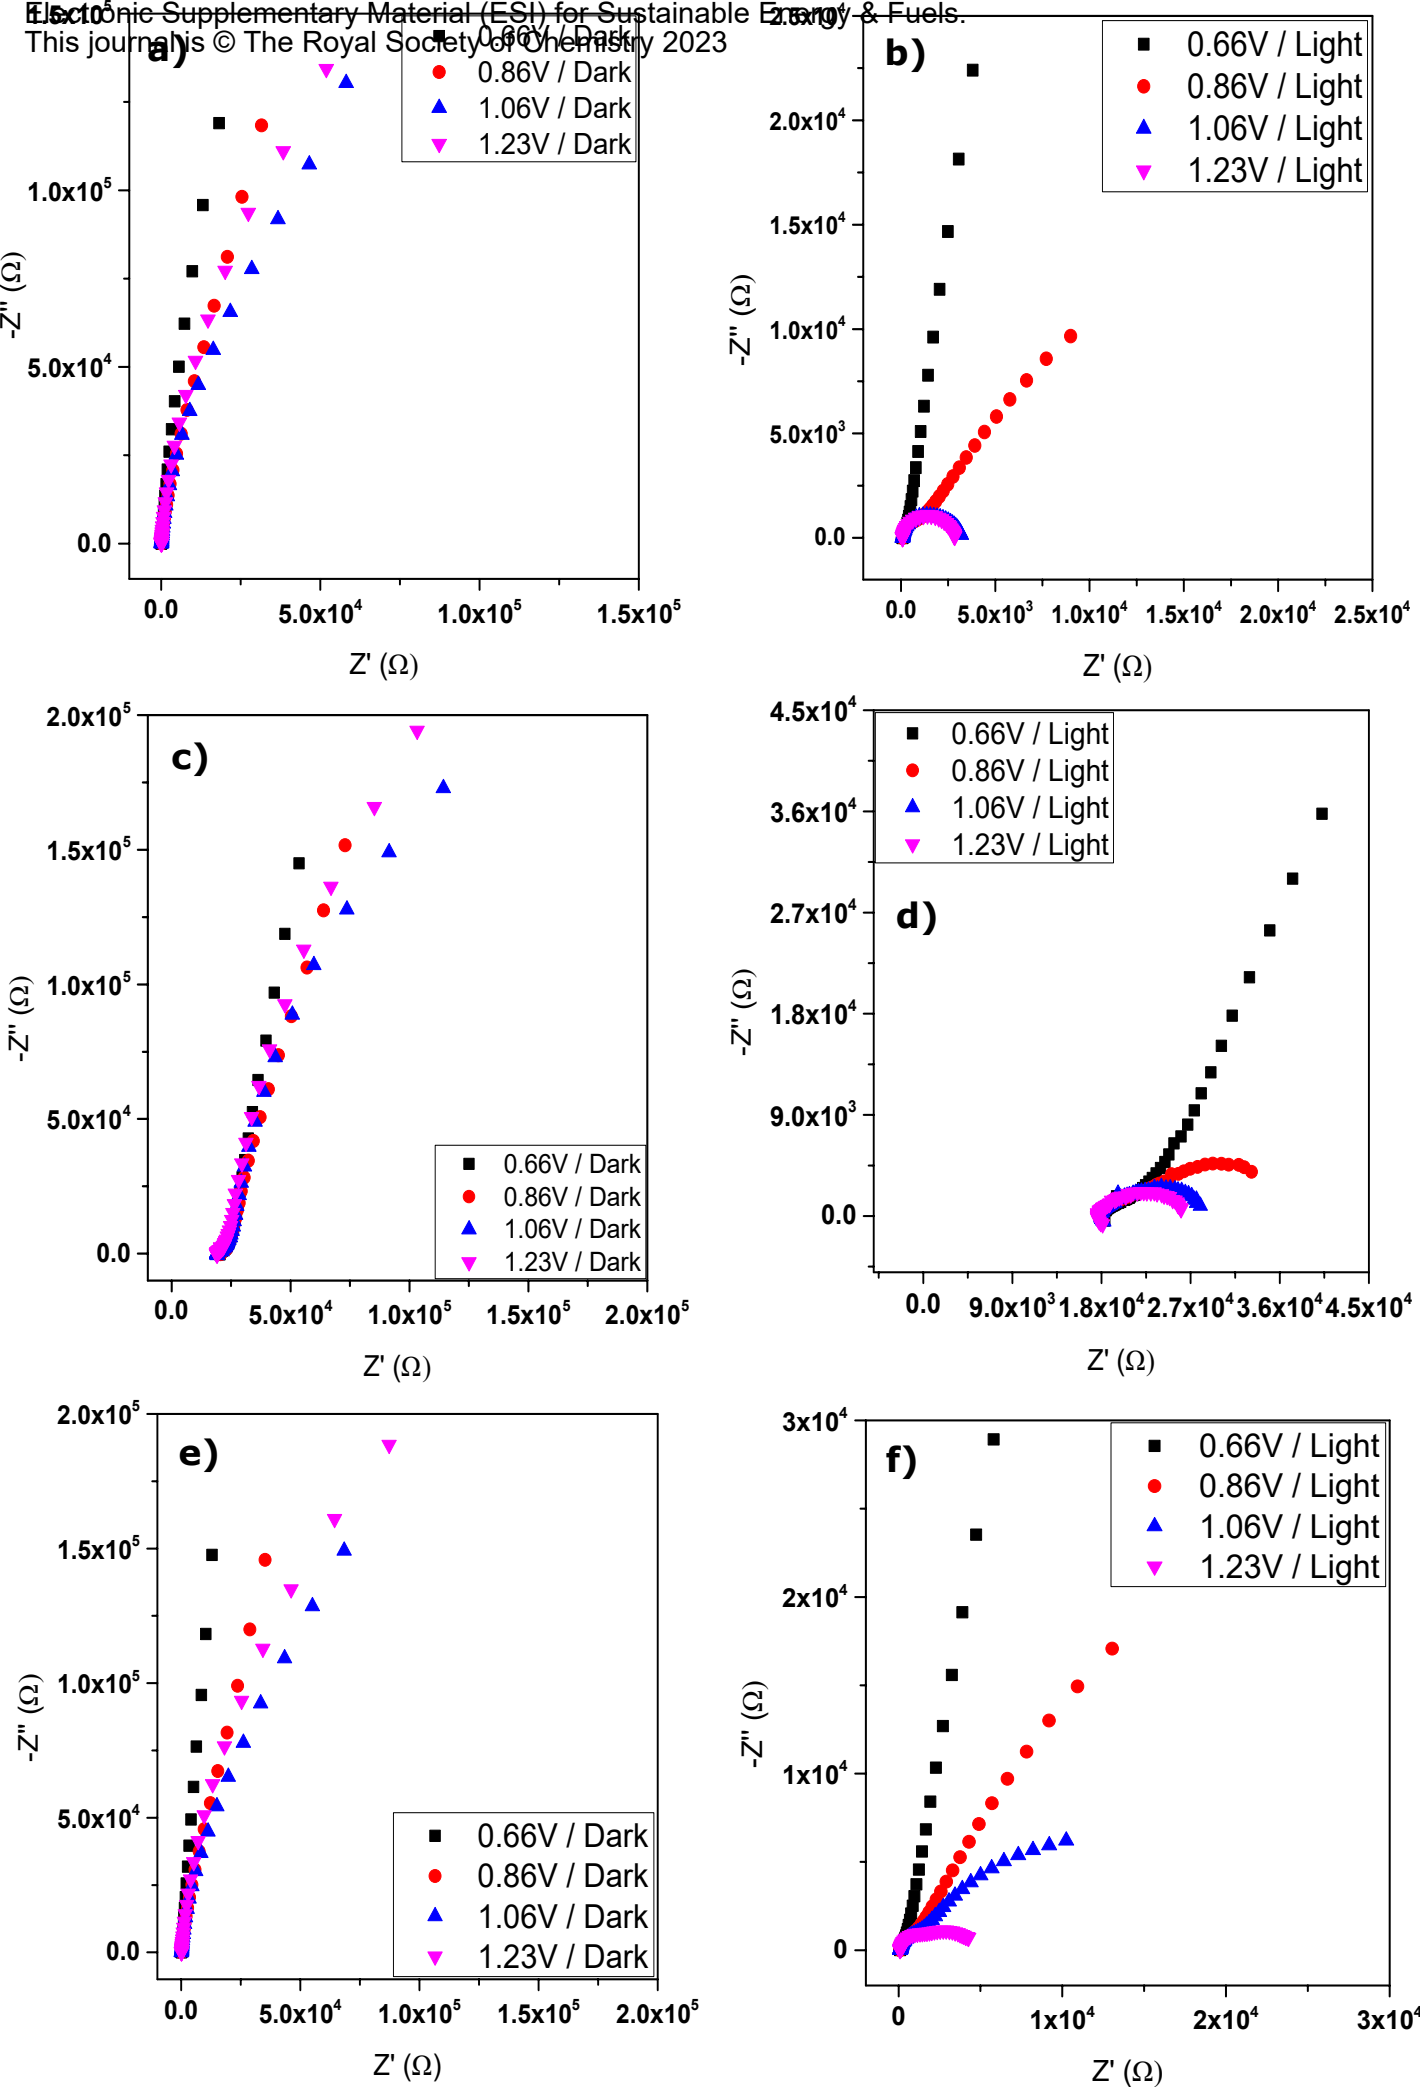

Supplement: d3se01045g9.pdf [file d3se01045g9.pdf]
